# Supplementary material for: Estimation of Genetic Parameters and Optimum Breeding Programme Design in Korean Flatfish Breeding Population
Source: MDPI journal article supplement (doi:10.3390/fishes7060357), 2022-11-28
Supplement: s1 [file s1]

# Estimation of Genetic Parameters and Optimum Breeding Programme Design in Korean Flatfish Breeding Population

Phuong Thanh N. Dinh<sup>1,†</sup>, Jong-Won Park<sup>2,†</sup>, Waruni Ekanayake<sup>3</sup>, Yeong Kuk Kim<sup>1</sup>, Doo Ho Lee<sup>3</sup>, Dain Lee<sup>2</sup>, Hyo Sun Jung<sup>2</sup>, Julian Kim<sup>2</sup>, Hye-Rim Yang<sup>2</sup>, Heegun Lee<sup>1,2</sup>, Sangwon Yoon<sup>1,2</sup>, Jeong-Ho Lee<sup>2,\*</sup>, and Seung Hwan Lee<sup>3,\*</sup>

<sup>1</sup> Department of Bio-AI Convergence, Chungnam National University, Daejeon, 34134, Republic of Korea

<sup>2</sup> Fish Genetics and Breeding Research Center, National Institute of Fisheries Science, Geoje, 53334, Republic of Korea

<sup>3</sup> Division of Animal & Dairy Science, Chungnam National University, Daejeon, 34134, Republic of Korea

<sup>†</sup> These authors contributed equally to the work

\* Correspondence: Jeong-Ho Lee: jhlee7124@korea.kr, Seung Hwan Lee: slee46@cnu.ac.kr

**Table S1.** Average measurements and fixed effects of BW, TL, and CF in 3 periods of time

| gen | batch | sex | n    | BW_11  | TL_11 | CF_11 | BW_18   | TL_18 | CF_18 | BW_22   | TL_22 | CF_22 |
|-----|-------|-----|------|--------|-------|-------|---------|-------|-------|---------|-------|-------|
| 1   | D1    | F   | 457  | 415.51 | 32.32 | 12.20 | 1342.18 | 48.65 | 11.57 | 2222.53 | 53.18 | 14.59 |
|     |       | M   | 330  | 342.11 | 30.37 | 12.11 | 843.18  | 42.16 | 11.14 | 1205.74 | 44.76 | 13.31 |
|     | R1    | F   | 111  | 294.19 | 28.23 | 12.83 | 802.84  | 40.70 | 11.69 | 1304.79 | 46.12 | 13.05 |
|     |       | M   | 97   | 207.21 | 25.84 | 11.90 | 541.09  | 36.91 | 10.59 | 772.55  | 39.97 | 11.91 |
|     | W1    | F   | 1312 | 311.13 | 29.18 | 12.18 | 1281.27 | 47.78 | 11.63 | 2104.26 | 52.12 | 14.71 |
|     |       | M   | 1018 | 293.50 | 28.58 | 12.35 | 833.12  | 41.88 | 11.19 | 1218.95 | 44.58 | 13.54 |
|     | W2    | F   | 1742 | 280.98 | 28.42 | 12.00 | 1092.47 | 45.74 | 11.27 | 1809.29 | 49.86 | 14.38 |
|     |       | M   | 2414 | 259.65 | 27.64 | 12.13 | 704.50  | 39.84 | 10.97 | 1042.74 | 42.61 | 13.29 |
| 2   | X1    | F   | 2915 | 497.75 | 34.51 | 11.94 | 1431.41 | 49.98 | 11.32 | 2343.00 | 54.90 | 14.07 |
|     |       | M   | 1694 | 426.90 | 32.79 | 11.98 | 846.36  | 42.49 | 10.80 | 1292.08 | 46.31 | 12.84 |
|     | X2    | F   | 1446 | 513.27 | 34.57 | 12.32 | 1477.73 | 50.23 | 11.54 | 2380.65 | 54.89 | 14.30 |
|     |       | M   | 951  | 443.24 | 32.89 | 12.39 | 833.93  | 42.30 | 10.84 | 1308.20 | 46.13 | 13.14 |
|     | X3    | F   | 362  | 462.10 | 33.13 | 12.59 | 1479.57 | 50.22 | 11.58 | 2407.19 | 54.62 | 14.64 |
|     |       | M   | 335  | 407.64 | 31.83 | 12.54 | 874.60  | 42.95 | 10.83 | 1271.15 | 45.53 | 13.33 |
| 3   | Y1    | F   | 4421 | 408.67 | 34.38 | 9.90  | 1367.18 | 48.36 | 11.98 | 1917.45 | 51.95 | 13.58 |
|     |       | M   | 3799 | 360.48 | 32.87 | 10.03 | 749.46  | 40.49 | 11.13 | 984.09  | 42.65 | 12.49 |
|     | Y2    | F   | 4055 | 389.74 | 33.24 | 10.47 | 1316.89 | 47.78 | 11.95 | 1813.71 | 51.24 | 13.38 |
|     |       | M   | 3298 | 350.34 | 31.88 | 10.70 | 790.85  | 41.17 | 11.16 | 1039.63 | 43.43 | 12.51 |
| 4   | Z1    | F   | 693  | NA     | NA    | NA    | 886.88  | 41.75 | 12.08 | 2607.65 | 57.73 | 13.43 |
|     |       | M   | 1668 | NA     | NA    | NA    | 656.06  | 37.79 | 12.05 | 1490.99 | 49.35 | 12.26 |
|     | Z2    | F   | 953  | NA     | NA    | NA    | 1149.82 | 46.93 | 11.02 | 1562.29 | 51.05 | 11.65 |
|     |       | M   | 290  | NA     | NA    | NA    | 881.53  | 42.92 | 11.05 | 1084.37 | 46.24 | 10.89 |
| 5   | A1    | F   | 2456 | 299.22 | 28.75 | 12.40 | 1083.46 | 44.92 | 11.83 | 1626.76 | 50.57 | 12.37 |
|     |       | M   | 1670 | 274.76 | 27.97 | 12.32 | 788.09  | 40.35 | 11.79 | 1186.88 | 45.59 | 12.25 |
|     | A2    | F   | 2373 | 680.10 | 38.01 | 12.36 | 1671.69 | 51.86 | 11.87 | 2635.21 | 56.97 | 14.08 |
|     |       | M   | 934  | 605.70 | 36.52 | 12.38 | 1028.36 | 44.16 | 11.77 | 1450.97 | 48.02 | 12.94 |
| 6   | B1    | F   | 2962 | 542.67 | 35.57 | 11.97 | 1231.13 | 47.51 | 11.40 | 2143.34 | 54.12 | 13.44 |
|     |       | M   | 2051 | 501.05 | 34.47 | 12.16 | 859.95  | 42.09 | 11.45 | 1352.71 | 47.32 | 12.66 |
| 7   | C1    | F   | 2763 | 567.13 | 35.98 | 12.07 | 1511.73 | 50.08 | 11.96 | 2489.10 | 56.07 | 14.03 |

|    |   |      |        |       |       |         |       |       |         |       |       |
|----|---|------|--------|-------|-------|---------|-------|-------|---------|-------|-------|
| C2 | M | 2021 | 505.13 | 34.53 | 12.16 | 1044.33 | 44.24 | 11.94 | 1559.43 | 49.45 | 12.73 |
|    | F | 1223 | 518.20 | 34.56 | 12.45 | 1405.80 | 48.56 | 12.20 | 2401.52 | 54.66 | 14.61 |
|    | M | 1345 | 466.18 | 33.34 | 12.50 | 998.45  | 43.27 | 12.23 | 1526.08 | 48.40 | 13.33 |

Table S2. ANOVA summary of fixed effects.

|       | Df    | F-value | p-value     |
|-------|-------|---------|-------------|
| BW_11 | Bacth | 13310   | < 2e-16 *** |
|       | Sex   | 4221    | < 2e-16 *** |
| BW_18 | Bacth | 514.8   | < 2e-16 *** |
|       | Sex   | 2780.6  | < 2e-16 *** |
| BW_22 | Bacth | 365     | < 2e-16 *** |
|       | Sex   | 1937    | < 2e-16 *** |
| TL_11 | Bacth | 63101   | < 2e-16 *** |
|       | Sex   | 4436    | < 2e-16 *** |
| TL_18 | Bacth | 787.7   | < 2e-16 *** |
|       | Sex   | 1045.3  | < 2e-16 *** |
| TL_22 | Bacth | 513.5   | < 2e-16 *** |
|       | Sex   | 699     | < 2e-16 *** |
| CF_11 | Bacth | 46999.6 | < 2e-16 *** |
|       | Sex   | 161.3   | < 2e-16 *** |
| CF_18 | Bacth | 951.1   | < 2e-16 *** |
|       | Sex   | 531     | < 2e-16 *** |
| CF_22 | Bacth | 411.8   | < 2e-16 *** |
|       | Sex   | 493.1   | < 2e-16 *** |

\*\*\*: significant under the threshold of 0.001

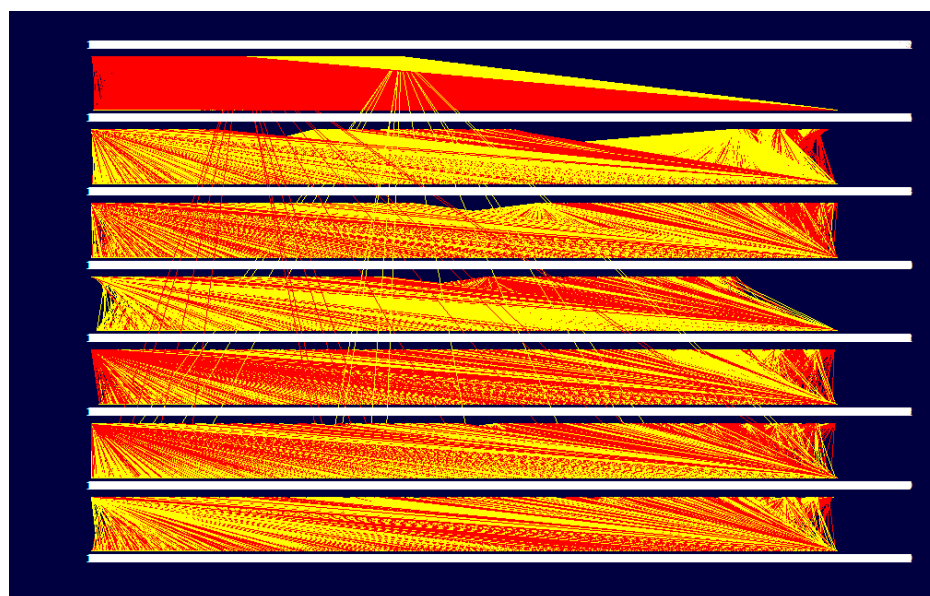

Figure S1. Diagram of pedigree information of 54,159 flatfish in 7 generations. Red lines indicate sires-offspring relationship and yellow lines indicate dam-offspring relationship.

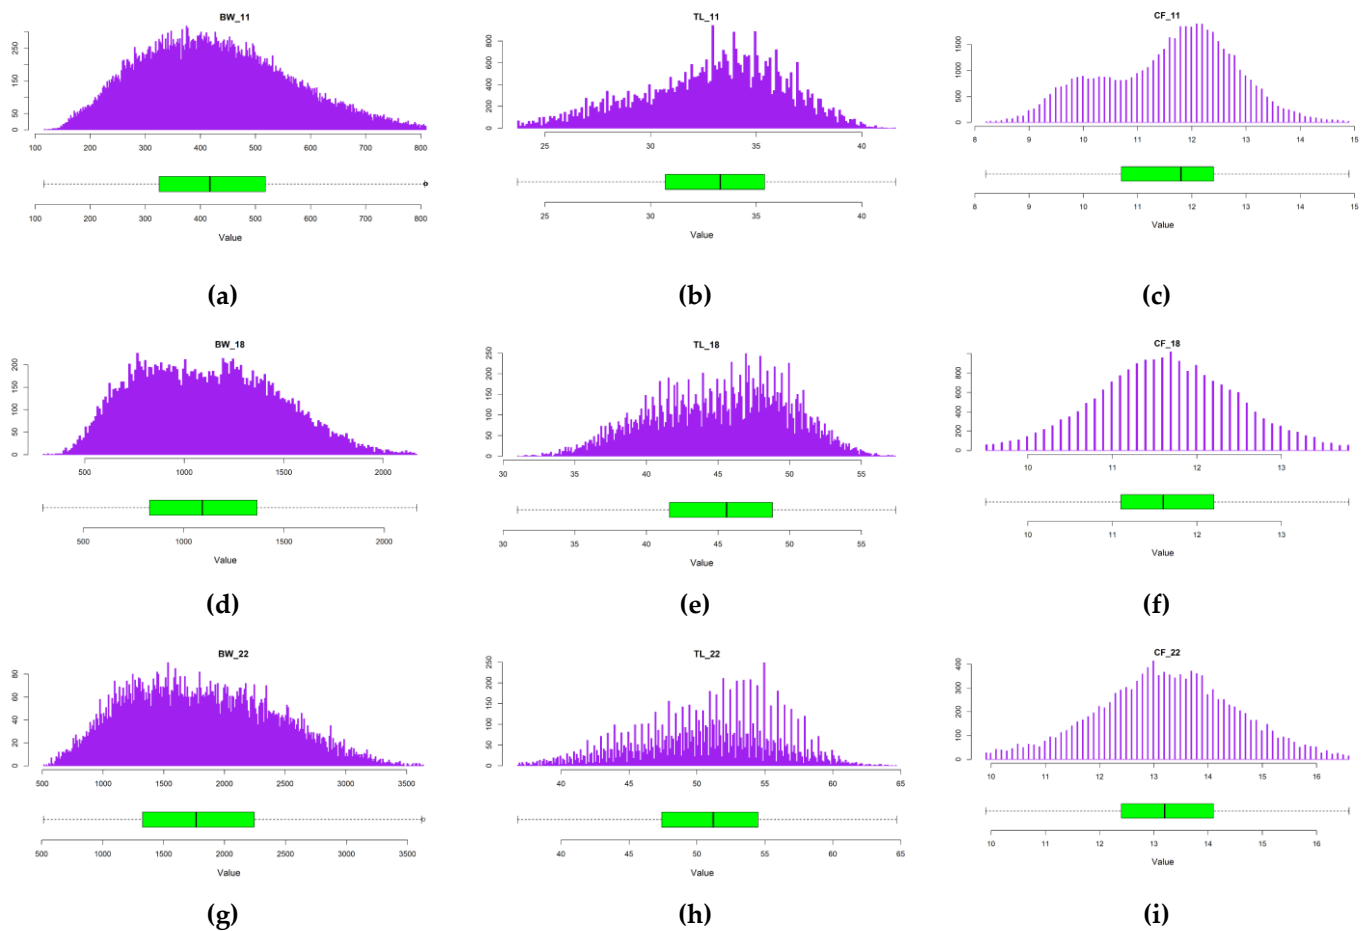

**Figure S2.** Distribution of 9 trait measurements: **(a)** Distribution of body weight at 11<sup>th</sup> month; **(b)** Distribution of body weight at 18<sup>th</sup> month; **(c)** Distribution of body weight at 22<sup>nd</sup> month; **(d)** Distribution of total length at 11<sup>th</sup> month; **(e)** Distribution of total length at 18<sup>th</sup> month; **(f)** Distribution of total length at 22<sup>nd</sup> month; **(g)** Distribution of condition factor at 11<sup>th</sup> month; **(h)** Distribution of condition factor at 18<sup>th</sup> month; **(i)** Distribution of condition factor at 22<sup>nd</sup> month.
